# Supplementary material
Source: Royal Society of Chemistry journal article supplement (doi:10.1039/d6cp00137h)
Supplement: d6cp00137h1.pdf [file d6cp00137h1.pdf]

## Tailored Mesoporous Carbons for High-Stability Supercapacitors with Optimized Ion Transport

Tomás Roccolano-Lindberg,<sup>a</sup> Leila M. Saleh Medina,<sup>a</sup> María Ana Castro,<sup>a</sup> Angela Torres-Delgado,<sup>b</sup> Rusbel Coneo-Rodríguez,<sup>b</sup> Gabriel A. Planes,<sup>b</sup> María Paula Longinotti,<sup>\*a</sup> Lucila P. Méndez De Leo<sup>\*a</sup>

<sup>a</sup>Instituto de Química Física de los Materiales, Medio Ambiente y Energía (INQUIMAE – CONICET) y Departamento de Química Analítica, Inorgánica y Química Física, Facultad de Ciencias Exactas y Naturales, Universidad de Buenos Aires, Intendente Guiraldes S/N – 1er piso, Buenos Aires, Argentina.

<sup>b</sup>Facultad de Ciencias Exactas, Fisicoquímicas y Naturales, Instituto de Investigaciones en Tecnologías Energéticas y Materiales Avanzados (IITEMA), Universidad Nacional de Río Cuarto-CONICET, Ruta Nac. 36, Km601, Río Cuarto, Córdoba, Argentina.

e-mail: [longinot@qi.fcen.uba.ar](mailto:longinot@qi.fcen.uba.ar)  
[lucilamd@qi.fcen.uba.ar](mailto:lucilamd@qi.fcen.uba.ar)

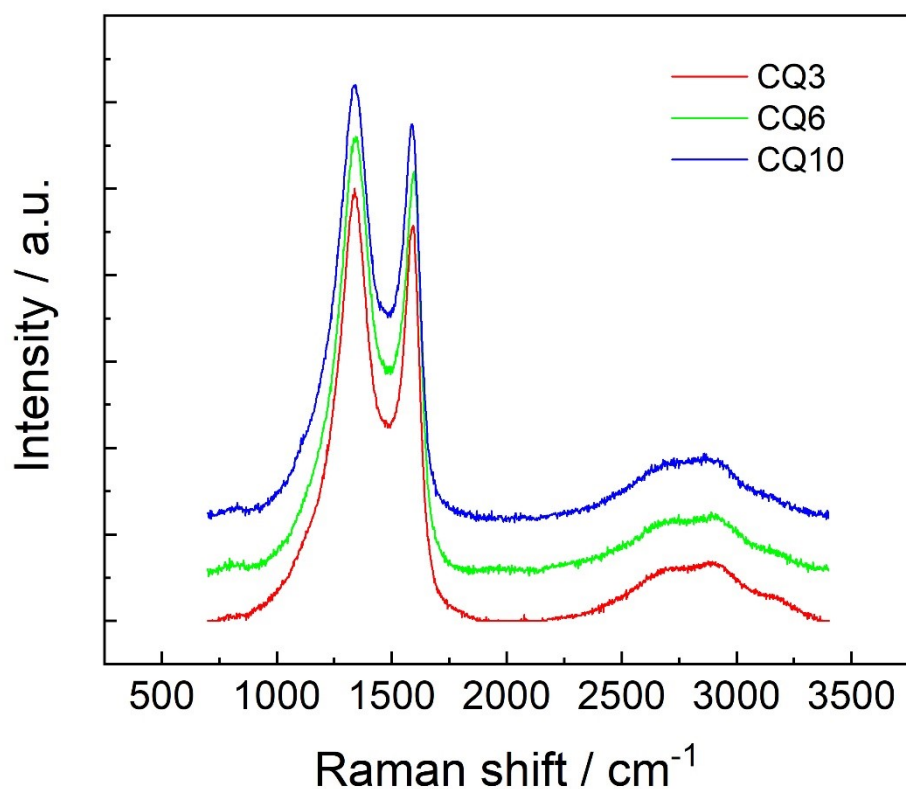

Figure S1: Raman spectra of CQ3, CQ6 and CQ10 carbons, normalized to the intensity of the D band for comparison. Spectra were recorded with 532 nm excitation and correspond to the average of four measurements acquired at a laser power of 2 mW.

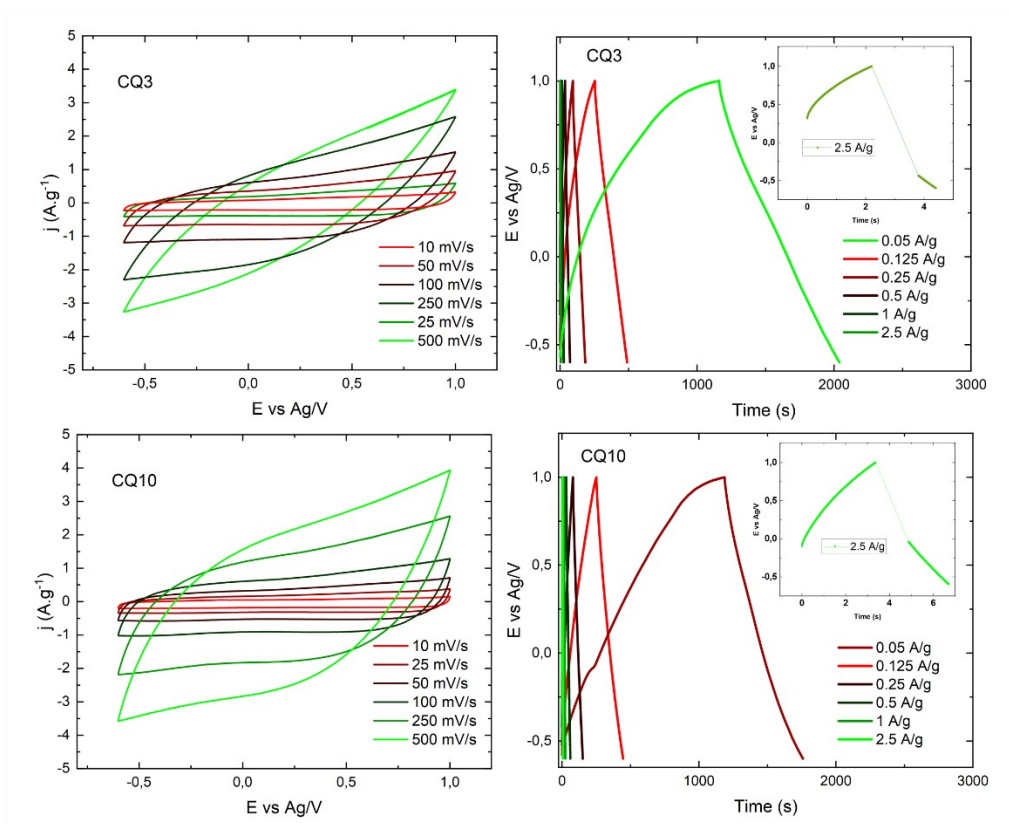

Figure S2: Upper: CV for CQ3 at different scan rates (left panel) and GCD curves for CQ3 at different current densities (right panel). Lower: CV for CQ10 at different scan rates (left panel) and GCD curves for CQ10 at different current densities (right panel). All measurements performed in 0.1 M Bu<sub>4</sub>NPF<sub>6</sub> in acetonitrile.

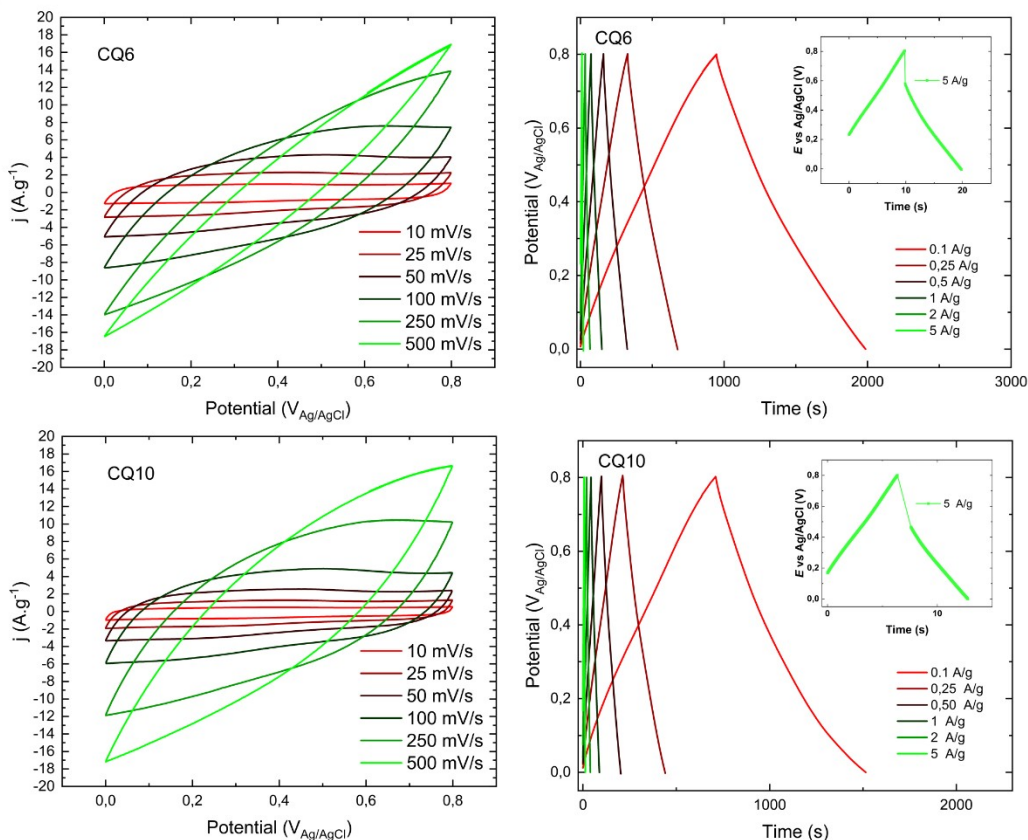

Figure S3: Upper: CV for CQ6 at different scan rates (left panel) and GCD curves for CQ6 at different current densities (right panel). Lower: CV for CQ10 at different scan rates (left panel) and GCD curves for CQ10 at different current densities (right panel). All measurements performed in aqueous 0.5 M  $\text{H}_2\text{SO}_4$ .

Table S1: Equivalent circuit results from fitting of EIS experiments at OCP in 0.5 M  $\text{H}_2\text{SO}_4$  aqueous solution and 0.1M  $\text{Bu}_4\text{NPF}_6$  in acetonitrile.

| Carbón | Organic medium     |                                      |                   | Aqueous medium     |                                      |                   |
|--------|--------------------|--------------------------------------|-------------------|--------------------|--------------------------------------|-------------------|
|        | $R_s$ ( $\Omega$ ) | $Y_0$ ( $\text{mS}\cdot\text{s}^n$ ) | $n$               | $R_s$ ( $\Omega$ ) | $Y_0$ ( $\text{mS}\cdot\text{s}^n$ ) | $n$               |
| CQ3    | $1129 \pm 8$       | $1.1 \pm 0.02$                       | $0.766 \pm 0.009$ | $510.9 \pm 0.8$    | $0.006 \pm 0.04$                     | $0.920 \pm 0.003$ |
| CQ6    | $1042 \pm 7$       | $0.598 \pm 0.008$                    | $0.765 \pm 0.006$ | $215.2 \pm 0.4$    | $0.006 \pm 0.03$                     | $0.937 \pm 0.002$ |
| CQ10   | $935.8 \pm 7$      | $0.414 \pm 0.006$                    | $0.789 \pm 0.007$ | $375.3 \pm 0.7$    | $1.49 \pm 0.006$                     | $0.924 \pm 0.002$ |

Table S2: Experimental setup and electrochemical performance parameters for the symmetric supercapacitors based on CQ6 in organic medium and CQ3 in aqueous medium before and after long-term galvanostatic charge-discharge (GCD) cycling.

|                                         | Organic                                  | Aqueous                               |
|-----------------------------------------|------------------------------------------|---------------------------------------|
| Active material                         | CQ6                                      | CQ3                                   |
| Total mass loading (mg)                 | 12                                       | 10.75                                 |
| Positive electrode (mg)                 | 5                                        | 5.75                                  |
| Negative electrode (mg)                 | 7                                        | 5                                     |
| Binder                                  | PVDF                                     | PVDF                                  |
| Electrolyte                             | 0.25 M nBu <sub>4</sub> NPF <sub>6</sub> | 1 M H <sub>2</sub> SO <sub>4</sub>    |
| Current collector                       | Expanded graphite<br>(GRAFILIT® SF)      | Expanded graphite<br>(GRAFILIT® SF)   |
| Separator                               | Glass microfiber filters<br>(Whatman)    | Glass microfiber<br>filters (Whatman) |
| Voltage range (V)                       | 2.7                                      | 0.8                                   |
| Current (mA)                            | 2                                        | 4                                     |
| Current density (A/g)                   | 0.17                                     | 0.37                                  |
| Number of cycles tested                 | 10000                                    | 20000                                 |
| Number of activation<br>cycles          | 1000                                     | 500                                   |
| Capacitance retention<br>after          | 85% / 9000                               | 96% / 19000                           |
| Energy Density before<br>(Wh kg)        | 3.775                                    | 1.69                                  |
| Energy Density after<br>cycling (Wh kg) | 2.835                                    | 1.55                                  |
| IR drop before testing<br>(V)           | 0.134                                    | 0.0424                                |
| IR drop after testing (V)               | 0.0989                                   | 0.0493                                |
| Power density before<br>testing (W/kg)  | 522.7                                    | 152.1                                 |
| Power density after<br>testing (W/kg)   | 425.2                                    | 146.84                                |
| Coulombic efficiency (%)                | 97                                       | 99                                    |

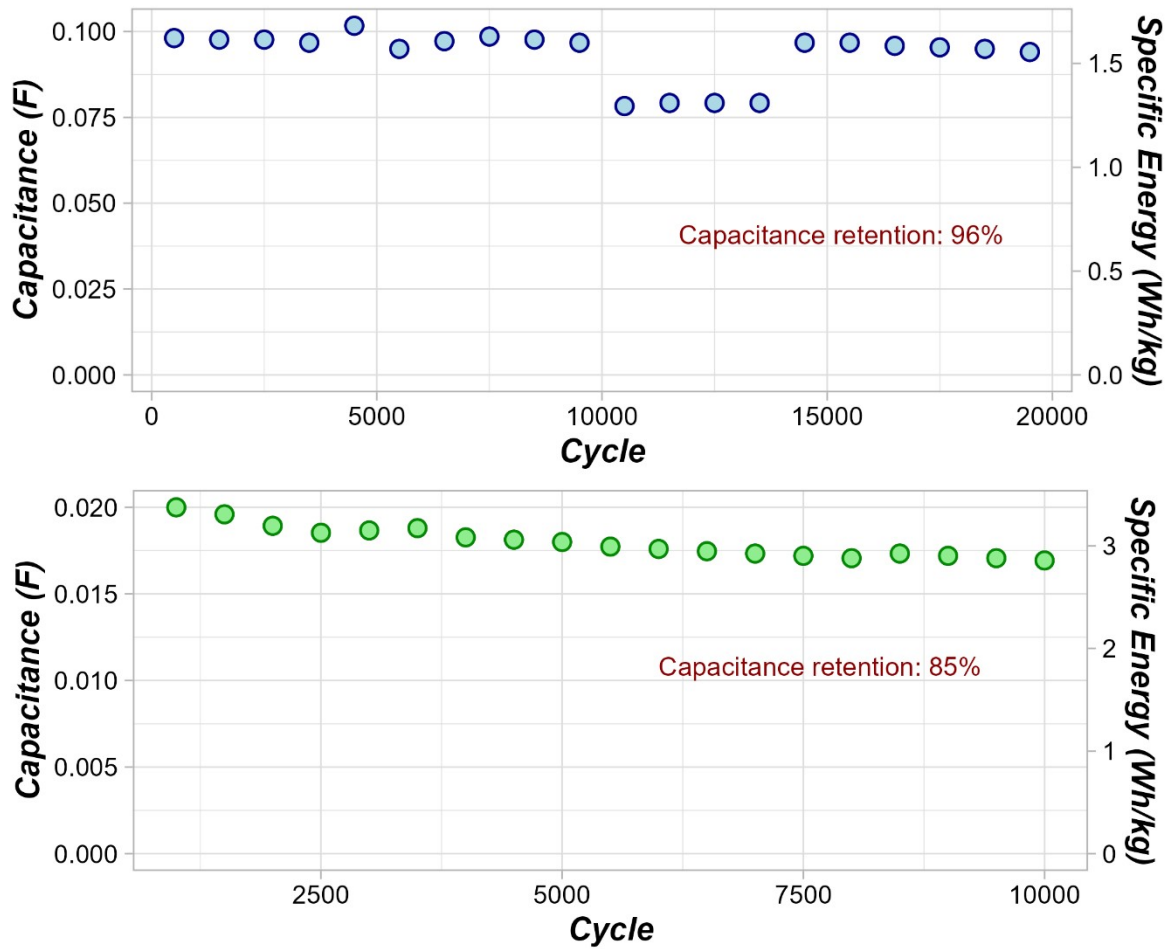

Figure S4: Capacitance vs. Cycle number for the two-electrode configuration. Top: in 0.1M  $\text{Bu}_4\text{NPF}_6$  in acetonitrile. Bottom: in 0.5 M  $\text{H}_2\text{SO}_4$  aqueous solution
